# Supplementary material for: Case Report: Temozolomide Treatment of Refractory Prolactinoma Resistant to Dopamine Agonists
Source: Frontiers journal article supplement (doi:10.3389/fendo.2021.616339), 2021-03-12
Supplement: Table_1.xlsx [file Table_1.xlsx]

## Sheet: Sheet1
SubGroupsIndex	SampleID	Gender	Age	WHO2017tumortype	Secretion	HormoneStaining	TumorSize	MIB1_Percent	CavernousInvasion	VisualDefect	DA_Resistance
1	H101	M	35	Lactotroph	Hyperperprolactinemia	P	4.5×3.0×3.0	2	Y	Y	S
2	H3	F	22	Lactotroph	Hyperperprolactinemia	P	0.4×0.4×0.4	1	N	N	R
3	H66	F	41	Lactotroph	Hyperperprolactinemia	P	0.7×0.7×0.7	1	N	N	R
4	H60	F	32	Lactotroph	Hyperperprolactinemia	P	0.9×0.9×0.9	1	N	N	S
5	H6	M	40	Lactotroph	Hyperperprolactinemia	P	2.8×2.7×2.1	1	Y	Y	R
6	H8	M	27	Lactotroph	Hyperperprolactinemia	P	1.0×0.9×1.1	1	N	N	R
7	H7	F	47	Lactotroph	Hyperperprolactinemia	P	1.1×0.9×0.9	1	N	N	R
8	H113	F	22	Lactotroph	Hyperperprolactinemia	P	0.6×0.6×0.6	1	N	N	R
9	H91	F	35	Lactotroph	Hyperperprolactinemia	P	0.7×1.1×1.0	1	N	N	R
10	H148	F	15	Lactotroph	Hyperperprolactinemia	P	0.7×0.7×0.7	2	N	N	S
11	H147	M	28	Lactotroph	Hyperperprolactinemia	P	0.6×0.6×0.6	2	N	N	S
12	H94	F	44	Lactotroph	Hyperperprolactinemia	P	0.6×0.6×0.6	3	N	N	S
13	H53	F	30	Lactotroph	Hyperperprolactinemia	P	0.3×0.6×0.7	1	N	N	S
14	H78	F	22	Lactotroph	Hyperperprolactinemia	P	1.5×1.3×0.9	1	N	N	R
15	H138	F	27	Lactotroph	Hyperperprolactinemia	P	0.4×0.4×0.4	3	N	N	S
16	H80	M	45	Lactotroph	Hyperperprolactinemia	P	1.6×1.8×2.1	10	Y	N	R
17	H77	F	58	Lactotroph	Hyperperprolactinemia	P	2.6×1.3×1.9	3	Y	N	R
18	H5	F	32	Lactotroph	Hyperperprolactinemia	P	3.5×3.0×2.5	5	Y	N	R
19	H2	M	42	Lactotroph	Hyperperprolactinemia	P	2.6×2.5×2.1	1	N	Y	R
20	H110	F	33	Lactotroph	Hyperperprolactinemia	P	1.6×1.6×1.8	5	N	N	R
21	H116	F	26	Lactotroph	Hyperperprolactinemia	P	2.7×1.5×1.2	10	Y	N	S
22	H64	F	22	Lactotroph	Hyperperprolactinemia	P	3.4×1.9×2.3	5	N	N	R
23	H74	M	44	Lactotroph	Hyperperprolactinemia	P	2.4×2.2×2.8	1	N	N	R
